# Supplementary material for: The role of point of care ultrasound in prehospital critical care: a systematic review
Source: PubMed Central journal article supplement (PMC6019293; doi:10.1186/s13049-018-0518-x), 2018-06-26
Supplement: 13049_2018_518_MOESM1_ESM.pdf [file 13049_2018_518_MOESM1_ESM.pdf]

**Supplement to:** The role of ultrasound in physician-provided prehospital critical care: a systematic review

Morten Thingemann Bøtker, Søren Steemann Rudolph, Lars Jacobsen, Lars Knudsen

**Content**

|                                                                                                |   |
|------------------------------------------------------------------------------------------------|---|
| Search strings                                                                                 | 2 |
| Supplementary Table 1. Studies excluded based on full-text                                     | 3 |
| Supplementary Table 2. SIGN 50 checklist of cohort studies included in the review              | 4 |
| Supplementary Table 3. SIGN 50 checklist of controlled studies included in the review          | 5 |
| Supplementary Table 4. SIGN 50 checklist of diagnostic accuracy studies included in the review | 6 |
| Supplementary references                                                                       | 7 |

## Search Strings

### *Pubmed*

("Emergency Medical Services"[Mesh] OR "Emergency Medical Services" OR prehospital OR pre-hospital OR out-of-hospital OR "out of hospital") AND ([ultraso\*[tiab] OR sonograph\*[tiab] OR echocardiograph\*[tiab])  
Limited to 2012-2017

### *Cochrane*

#1 MeSH descriptor: [Emergency Medical Services] explode all trees  
#2 "Emergency Medical Services"  
#3 prehospital OR pre-hospital OR out-of-hospital OR "out-of-hospital"  
#4 ultraso\* or sonograph\* or echocardiograph\*  
(#1 OR #2 OR #3) AND #4  
Limited to 2012-2017

### *EMBASE:*

#1 'emergency health service'/exp OR 'emergency care'/exp OR prehospital OR 'pre-hospital' OR 'out-of-hospital'  
#2 'ultraso\*' OR 'sonograph\*' OR 'echocardiograph\*'  
#1 AND #2  
Limited to 2012-2017

**Supplementary Table 1. Studies excluded based on full-text**

| Number | Study                                                                                                                                                                                                                                        | Cause                                                                                |
|--------|----------------------------------------------------------------------------------------------------------------------------------------------------------------------------------------------------------------------------------------------|--------------------------------------------------------------------------------------|
| 1      | Brun et al., 2013. The value of prehospital echocardiography in shock management[1]                                                                                                                                                          | Case report                                                                          |
| 2      | Callero et al., 2015. TRACE: A new protocol for ultrasound examination during out-of-hospital cardiac arrest[2]                                                                                                                              | Conference abstract                                                                  |
| 3      | Castellani et al., 2012. Telementoring: Ultrasound training and research[3]                                                                                                                                                                  | Conference abstract                                                                  |
| 4      | Grmec et al., 2012. Sonographic B-Line, NT-proBNP and pressure of end-tidal CO2 (petCO2) in diagnosis of acute heart failure in prehospital emergency setting[4]                                                                             | Conference abstract                                                                  |
| 5      | Hanlin et al., 2016. Airway ultrasound for the confirmation of endotracheal tube placement in military flight medic trainees[5]                                                                                                              | Conference abstract                                                                  |
| 6      | Jones et al., 2014. The effect of thoracic ultrasound for the detection of pneumothorax on medical decisionmaking in trauma patients in the out-of-hospital setting[6]                                                                       | Conference abstract                                                                  |
| 7      | Kamp et al., 2012. Ultrasound enhanced prehospital thrombolysis using microbubbles in patients with acute ST elevation myocardial infarction[7]                                                                                              | Conference abstract                                                                  |
| 8      | Knapp et al., 2015. Quality and accuracy of fast exams performed by ems providers in the out-of-hospital setting[8]                                                                                                                          | Conference abstract                                                                  |
| 9      | Knapp et al., 2012. Emergency medical services focused assessment with sonography in trauma and cardiac ultrasound in cardiac arrest: The training phase[9]                                                                                  | Conference abstract                                                                  |
| 10     | Lahham et al., 2015. Prehospital assessment with ultrasound in emergencies-pause II[10]                                                                                                                                                      | Conference abstract                                                                  |
| 11     | Lema et al., 2014. Ultrasound identification of successful endotracheal tube placement by paramedics and residents[11]                                                                                                                       | Conference abstract                                                                  |
| 12     | Lyon et al., 2012. Is there a role for pre-hospital chest ultrasound in trauma patients?[12]                                                                                                                                                 | Conference abstract                                                                  |
| 13     | Ogedegbe et al., 2012. A novel portable teleultrasonography system for out-of-hospital trauma care[13]                                                                                                                                       | Conference abstract                                                                  |
| 14     | Schlachetzki et al., 2014. Pre-hospital thrombolysis - Is the ultrasound diagnosis of occlusion enough?[14]                                                                                                                                  | Conference abstract                                                                  |
| 15     | Skulec et al., 2015. TRACE: A new protocol for ultrasound examination during out-of-hospital cardiac arrest[15]                                                                                                                              | Conference abstract                                                                  |
| 16     | Vitto et al., 2015. Implementation of a flight medical crew ultrasound training program[16]                                                                                                                                                  | Conference abstract                                                                  |
| 17     | Schlachetzki et al., 2012. Transcranial ultrasound from diagnosis to early stroke treatment: part 2: prehospital neurosonography in patients with acute stroke: the Regensburg stroke mobile project[17]                                     | Cohort included in other publication with more clinical data (Herzberg et al., 2014) |
| 18     | Atkinson et al., 2014. Coming of age: emergency point of care ultrasonography in Canada[18]                                                                                                                                                  | Editorial                                                                            |
| 19     | Lien, 2014. Emergency ultrasound[19]                                                                                                                                                                                                         | Editorial                                                                            |
| 20     | Brun et al., 2014. Ultrasound evaluation of the nasogastric tube position in prehospital[20]                                                                                                                                                 | Non-english                                                                          |
| 21     | Weilbach et al., 2017. Introduction of Prehospital Emergency Ultrasound into an Emergency Medical Service Area[21]                                                                                                                           | Non-english                                                                          |
| 22     | Brandt et al., 2016. The use of ultrasound to identify veins for peripheral venous access in morbidly obese patients[22]                                                                                                                     | Not prehospital                                                                      |
| 23     | Breitkreutz et al., 2013. Thorax, trachea, and lung ultrasonography in emergency and critical care medicine: Assessment of an objective structured training concept[23]                                                                      | Not prehospital                                                                      |
| 24     | Cazes et al., 2013. Emergency ultrasound: A prospective study on sufficient adequate training for military doctors[24]                                                                                                                       | Not prehospital                                                                      |
| 25     | Chaudery et al., 2016. Can contrast-enhanced ultrasonography improve Zone III REBOA placement for prehospital care?[25]                                                                                                                      | Not prehospital                                                                      |
| 26     | Jang et al., 2012. Sonographic assessment of jugular venous distension and B-type natriuretic peptide levels in patients with dyspnoea[26]                                                                                                   | Not prehospital                                                                      |
| 27     | Jang et al., 2012. The technical errors of physicians learning to perform focused assessment with sonography in trauma[27]                                                                                                                   | Not prehospital                                                                      |
| 28     | Kim et al., 2016. Can serial focussed echocardiographic evaluation in life support (FEEL) predict resuscitation outcome or termination (TOR)? A pilot study[28]                                                                              | Not prehospital                                                                      |
| 29     | Lee et al., 2015. Combined ECG, echocardiographic, and biomarker criteria for diagnosing acute myocardial infarction in out-of-hospital cardiac arrest patients[29]                                                                          | Not prehospital                                                                      |
| 30     | Ozkan et al., 2015. Stethoscope versus point-of-care ultrasound in the differential diagnosis of dyspnea: a randomized trial[30]                                                                                                             | Not prehospital                                                                      |
| 31     | Slikkerveer et al., 2012. Ultrasound enhanced prehospital thrombolysis using microbubbles infusion in patients with acute ST elevation myocardial infarction: pilot of the Sonolysis study[31]                                               | Not prehospital                                                                      |
| 32     | Ogedegbe et al., 2012. Development and evaluation of a novel, real time mobile teleultrasonography system in management of patients with abdominal trauma: Study protocol[32]                                                                | Study protocol                                                                       |
| 33     | Hong et al., 2012. Detecting prehospital hemoperitoneum remotely through fast and 3 g network: A simulation study[33]                                                                                                                        | Simulation study, no patients included                                               |
| 34     | Kirkpatrick et al., 2016. Remote just-in-time telementored trauma ultrasound: a double-factorial randomized controlled trial examining fluid detection and remote knobology control through an ultrasound graphic user interface display[34] | Simulation study, no patients included                                               |
| 35     | Lyon et al., 2012. M-mode ultrasound for the detection of pneumothorax during helicopter transport[35]                                                                                                                                       | Simulation study, no patients included                                               |
| 36     | Lyon et al., 2012. Ultrasound detection of the sliding lung sign by prehospital critical care providers[36]                                                                                                                                  | Simulation study, no patients included                                               |
| 37     | McBeth et al., 2013. Help is in your pocket: the potential accuracy of smartphone- and laptop-based remotely guided resuscitative teleultrasonography[37]                                                                                    | Simulation study, no patients included                                               |
| 38     | Song et al., 2013. Clinical applicability of real-time, prehospital image transmission for FAST (Focused Assessment with Sonography for Trauma)[38]                                                                                          | Simulation study, no patients included                                               |

**Supplementary Table 2. SIGN 50 checklist of cohort studies included in the review**

|                                             |      | Study                                                                                                                                           |            |                 |                    |            |              |              |              |          |
|---------------------------------------------|------|-------------------------------------------------------------------------------------------------------------------------------------------------|------------|-----------------|--------------------|------------|--------------|--------------|--------------|----------|
| <i>In a well conducted cohort study....</i> |      | Aichinger, 2012                                                                                                                                 | Chin, 2013 | Ketelaars, 2013 | ODochartaigh, 2017 | Reed, 2017 | Roline, 2013 | Rooney, 2016 | Strnad, 2016 |          |
| Internal Validity                           | 1.1  | The study addresses an appropriate and clearly focused question                                                                                 | ○          | ○               | ○                  | ○          | ○            | ○            | ○            |          |
|                                             | 1.2  | The two groups being studied are selected from source populations that are comparable in all respects other than the factor under investigation | ○          | ○               | ○                  | ○          | ○            | ○            | ○            |          |
|                                             | 1.3  | The study indicates how many of the people asked to take part did so, in each of the groups being studied                                       | ○          | ○               | ○                  | ○          | ○            | ○            | ○            |          |
|                                             | 1.4  | The likelihood that some eligible subjects might have the outcome at the time of enrollment is assessed and taken into account in the analysis  | ○          | ○               | ○                  | ○          | ○            | ○            | ○            |          |
|                                             | 1.5  | What percentage of individuals or clusters recruited into each arm of the study dropped out before the study was completed                      | Total 0    | Total 0         | ○                  | ○          | Total 13     | Total 0      | Total 80     | I/C 14/0 |
|                                             | 1.6  | Comparison is made between full participants and those lost to follow up, by exposure status                                                    | ○          | ○               | ○                  | ○          | ○            | ○            | ○            | ○        |
|                                             | 1.7  | The outcomes are clearly defined                                                                                                                | ○          | ○               | ○                  | ○          | ○            | ○            | ○            | ○        |
|                                             | 1.8  | The assessment of outcome is made blind to exposure status                                                                                      | ○          | ○               | ○                  | ○          | ○            | ○            | ○            | ○        |
|                                             | 1.9  | Where blinding not possible, there is some recognition that knowledge of exposure status could have influenced the assessment of outcome        | ○          | ○               | ○                  | ○          | ○            | ○            | ○            | ○        |
|                                             | 1.10 | The measure of assessment of exposure is reliable                                                                                               | ○          | ○               | ○                  | ○          | ○            | ○            | ○            | ○        |
|                                             | 1.11 | Evidence of other sources is used to demonstrate that the method of outcome assessment is valid and reliable                                    | ○          | ○               | ○                  | ○          | ○            | ○            | ○            | ○        |
|                                             | 1.12 | Exposure level or prognostic factor is assessed more than once                                                                                  | ○          | ○               | ○                  | ○          | ○            | ○            | ○            | ○        |
|                                             | 1.13 | The main potential confounders are identified and taken into account in the design and analysis                                                 | ○          | ○               | ○                  | ○          | ○            | ○            | ○            | ○        |
|                                             | 1.14 | Confidence intervals are provided                                                                                                               | ○          | ○               | ○                  | ○          | ○            | ○            | ○            | ○        |
| Overall                                     | 2.1  | How well was the study done to minimise the risk of bias or confounding?                                                                        | +          | 0               | +                  | 0          | +            | +            | +            | 0        |
|                                             | 2.2  | There is a clear evidence of an association between exposure and outcome                                                                        | ○          | ○               | ○                  | ○          | ○            | ○            | ○            | ○        |
|                                             | 2.3  | Are the results of this study directly applicable to the patient group targeted?                                                                | ○          | ○               | ○                  | ○          | ○            | ○            | ○            | ○        |

**Legend**

|              |   |
|--------------|---|
| Yes          | ○ |
| Can't say    | ○ |
| No           | ○ |
| Not reported | ○ |

**Quality rating**

|              |    |
|--------------|----|
| High quality | ++ |
| Acceptable   | +  |
| Unacceptable | 0  |

Does not apply

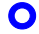

Supplementary Table 3. SIGN 50 checklist of controlled studies included in the review

|                                                 |      | Study                                                                                                                                       |                 |               |                |               |                |               |                  |                |                |                |              |
|-------------------------------------------------|------|---------------------------------------------------------------------------------------------------------------------------------------------|-----------------|---------------|----------------|---------------|----------------|---------------|------------------|----------------|----------------|----------------|--------------|
| <i>In a well conducted controlled study....</i> |      | Bobbia,<br>2015                                                                                                                             | Botker,<br>2017 | Brun,<br>2014 | Krogh,<br>2016 | Bhat,<br>2015 | Booth,<br>2015 | Brun,<br>2014 | Paddock,<br>2015 | Press,<br>2013 | Quick,<br>2016 | Yates,<br>2017 |              |
| Internal Validity                               | 1.1  | The study addresses an appropriate and clearly focused question                                                                             |                 |               |                |               |                |               |                  |                |                |                |              |
|                                                 | 1.2  | The assignment of subjects to treatment groups is randomized                                                                                |                 |               |                |               |                |               |                  |                |                |                |              |
|                                                 | 1.3  | <i>An adequate concealment method is used</i>                                                                                               |                 |               |                |               |                |               |                  |                |                |                |              |
|                                                 | 1.4  | The design keeps subjects and investigators 'blind' about treatment allocation                                                              |                 |               |                |               |                |               |                  |                |                |                |              |
|                                                 | 1.5  | The treatment and control groups are similar at the start of the trial                                                                      |                 |               |                |               |                |               |                  |                |                |                |              |
|                                                 | 1.6  | The only difference between groups is the treatment under investigation                                                                     |                 |               |                |               |                |               |                  |                |                |                |              |
|                                                 | 1.7  | All relevant outcomes are measured in a standard, valid and reliable way                                                                    |                 |               |                |               |                |               |                  |                |                |                |              |
|                                                 | 1.8  | What percentage of the individuals or clusters recruited into each treatment arm of the study dropped out before the study was completed?   | 0%              | Total<br>10%  |                | Total<br>34%  | Total<br>2%    | Total<br>9%   |                  | 0%             | Total<br>3%    | Total<br>22%   | Total<br>48% |
|                                                 | 1.9  | <i>All the subjects are analyzed in the groups to which they were randomly allocated (often referred to as intention to treat analysis)</i> |                 |               |                |               |                |               |                  |                |                |                |              |
|                                                 | 1.10 | Where the study is carried out at more than one site, results are comparable for all sites                                                  |                 |               |                |               |                |               |                  |                |                |                |              |
| Overall                                         | 2.1  | How well was the study done to minimize bias?                                                                                               | <b>+</b>        | <b>+</b>      | <b>-</b>       | <b>+</b>      | <b>+</b>       | <b>-</b>      | <b>0</b>         | <b>+</b>       | <b>+</b>       | <b>+</b>       | <b>-</b>     |
|                                                 | 2.2  | It seems certain that the overall effect is due to the study association                                                                    |                 |               |                |               |                |               |                  |                |                |                |              |
|                                                 | 2.3  | The results are directly applicable to the patients targeted                                                                                |                 |               |                |               |                |               |                  |                |                |                |              |

## Legend

|                |  |
|----------------|--|
| Yes            |  |
| Can't say      |  |
| No             |  |
| Not reported   |  |
| Does not apply |  |

## Quality rating

|              |           |
|--------------|-----------|
| High quality | <b>++</b> |
| Acceptable   | <b>+</b>  |
| Low quality  | <b>-</b>  |
| Unacceptable | <b>0</b>  |

**Supplementary Table 4. SIGN 50 checklist of diagnostic accuracy studies included in the review**

|                                                          |                                                                                                                                         | Study          |               |               |                |              |             |             |            |
|----------------------------------------------------------|-----------------------------------------------------------------------------------------------------------------------------------------|----------------|---------------|---------------|----------------|--------------|-------------|-------------|------------|
|                                                          |                                                                                                                                         | Herzberg, 2014 | Laurson, 2016 | Charron, 2015 | Chenaita, 2012 | Neesse, 2012 | Zadel, 2015 | Press, 2014 | West, 2014 |
| <i>In a well conducted diagnostic accuracy study....</i> |                                                                                                                                         |                |               |               |                |              |             |             |            |
| Patient selection                                        | 1.1 A consecutive sequence or random selection of patients is enrolled                                                                  | ○              | ○             | ○             | ○              | ○            | ○           | ○           | ○          |
|                                                          | 1.2 Case – control methods are not used                                                                                                 | ○              | ○             | ○             | ○              | ○            | ○           | ○           | ○          |
|                                                          | 1.3 Inappropriate exclusions are avoided                                                                                                | ○              | ○             | ○             | ○              | ○            | ○           | ○           | ○          |
|                                                          | 1.4 The included patients and settings match the key question                                                                           | ○              | ○             | ○             | ○              | ○            | ○           | ○           | ○          |
| Index test                                               | 2.1 The index test results are interpreted without knowledge of the results of the reference standard                                   | ○              | ○             | ○             | ○              | ○            | ○           | ○           | ○          |
|                                                          | 2.2 If a threshold is used, it is pre-specified                                                                                         | ○              | ○             | ○             | ○              | ○            | ○           | ○           | ○          |
|                                                          | 2.3 The index test, its conduct, and its interpretation is similar to that used in practice with the target population of the guideline | ○              | ○             | ○             | ○              | ○            | ○           | ○           | ○          |
| Reference standard                                       | 3.1 The reference standard is likely to correctly identify the target condition                                                         | ○              | ○             | ○             | ○              | ○            | ○           | ○           | ○          |
|                                                          | 3.2 Reference standard results are interpreted without knowledge of the results of the index test                                       | ○              | ○             | ○             | ○              | ○            | ○           | ○           | ○          |
|                                                          | 3.3 The target condition as defined by the reference standard matches that found in the target population of the guideline              | ○              | ○             | ○             | ○              | ○            | ○           | ○           | ○          |
| Flow & timing                                            | 4.1 There is an appropriate interval between the index test and reference standard                                                      | ○              | ○             | ○             | ○              | ○            | ○           | ○           | ○          |
|                                                          | 4.2 All patients receive the same reference standard                                                                                    | ○              | ○             | ○             | ○              | ○            | ○           | ○           | ○          |
|                                                          | 4.3 All patients recruited into the study are included in the analysis                                                                  | ○              | ○             | ○             | ○              | ○            | ○           | ○           | ○          |
| Overall                                                  | 2.1 How well was the study done to minimize bias?                                                                                       | 0              | +             | +             | +              | +            | 0           | +           | 0          |
|                                                          | 2.2 What is the applicability of this study to the target population                                                                    | ○              | ○             | ○             | ○              | ○            | ○           | ○           | ○          |

**Legend**

|                |   |
|----------------|---|
| Yes            | ○ |
| Can't say      | ○ |
| No             | ○ |
| Not reported   | ○ |
| Does not apply | ○ |

**Quality rating**

|              |    |
|--------------|----|
| High quality | ++ |
| Acceptable   | +  |
| Unacceptable | 0  |

**Applicability**

|                     |   |
|---------------------|---|
| Directly applicable | ○ |
| Some indirectness   | ○ |

## Supplementary references

1. Brun PM, Chenaitia H, Gonzva J, Bessereau J, Bobbia X, Peyrol M. The value of prehospital echocardiography in shock management. *Am J Emerg Med.* 2013;31:442.
2. Callero J, Skulec R, Knor J, Cerny V. TRACE: A new protocol for ultrasound examination during out-of-hospital cardiac arrest. *Crit Care.* 2015; DOI:10.1186/cc14496.
3. Castellani S, Meneghetti G. Telementoring: Ultrasound training and research. *Cerebrovasc Dis.* 2012; DOI:10.1159/000338951.
4. Grmec S, Hajdinjak E, Prosen G. Sonographic B-Line, NT-proBNP and pressure of end-tidal CO<sub>2</sub> (petCO<sub>2</sub>) in diagnosis of acute heart failure in prehospital emergency setting. *Circulation.* 2012; DOI: 10.1161/CIR.0b013e31824fcd6b.
5. Hanlin E. Airway ultrasound for the confirmation of endotracheal tube placement in military flight medic trainees. *Acad Emerg Med.* 2016; DOI:10.1111/acem.12974.
6. Jones RA, Tabbut M, Emerman C, Stout S. The effect of thoracic ultrasound for the detection of pneumothorax on medical decisionmaking in trauma patients in the out-of-hospital setting. *Ann Emerg Med.* 2014; DOI:10.1016/j.annemergmed.2014.07.109.
7. Kamp O, Slikkerveer J. Ultrasound enhanced prehospital thrombolysis using microbubbles in patients with acute ST elevation myocardial infarction. *Circulation.* 2012; doi:10.1161/CIR.0b013e31824fcd6b.
8. Knapp B, Byars D, Ford L. Quality and accuracy of fast exams performed by ems providers in the outof-hospital setting. *Acad Emerg Med.* 2015; doi:10.1111/acem.12644.
9. Knapp B, Byars D, Stewart V, Ryszkiewicz R, Evans D. Emergency medical services focused assessment with sonography in trauma and cardiac ultrasound in cardiac arrest: The training phase. *Acad Emerg Med.* 2012; DOI:10.1111/j.1553-2712.2012.01332.x.
10. Lahham S, Rooney K, Sloane B, Fox JC. Prehospital assessment with ultrasound in emergencies-pause II. *Acad Emerg Med.* 2015; DOI:10.1111/acem.12644.
11. Lema PC, Wilson J, O'Brien M, Lindstrom H, Tanski C, Consiglio J et al. Ultrasound identification of successful endotracheal tube placement by paramedics and residents. *Ann Emerg Med.* 2014; DOI:10.1016/j.annemergmed.2014.07.043.
12. Lyon R, Weaver A, Wise D, Davies G, Lockey D. Is there a role for pre-hospital chest ultrasound in trauma patients? *Resuscitation.* 2012; DOI:org/10.1016/j.resuscitation.2012.08.218.
13. Ogedegbe C. A novel portable teleultrasonography system for out-of-hospital trauma care. *Ann Emerg Med.* 2012; DOI:10.1016/j.annemergmed.2012.06.236.
14. Schlachetzki F, Herzberg M, Pflug K, Backhaus R, Baldaranov D, Ertl M et al. Pre-hospital thrombolysis - Is the ultrasound diagnosis of occlusion enough? *Cerebrovasc Dis.* 2014; DOI: 10.1159/000363090.
15. Skulec R, Truhlar A, Knor J, Cerny V. TRACE: A new protocol for ultrasound examination during out-of-hospital cardiac arrest. *Resuscitation.* 2015; DOI: 10.1016/j.resuscitation.2015.09.111.
16. Vitto MJ, Spector D, Evans DP. Implementation of a flight medical crew ultrasound training program. *Academic Emergency Medicine.* 2015; DOI:10.1111/acem.12644.
17. Schlachetzki F, Herzberg M, Holscher T, Ertl M, Zimmermann M, Ittner KP et al. Transcranial ultrasound from diagnosis to early stroke treatment: part 2: prehospital neurosonography in patients with acute stroke: the Regensburg stroke mobile project. *Cerebrovasc Dis.* 2012;33:262-71.
18. Atkinson P, Ross P, Henneberry R. Coming of age: emergency point of care ultrasonography in Canada. *CJEM.* 2014;16:265-8.
19. Lien WC. Emergency ultrasound. *J Med Ultrasound.* 2014; DOI:10.1016/j.jmu.2014.05.007.
20. Brun PM, Chenaitia H, Bessereau J, Leyral J, Barberis C, Pradel-Thierry AL et al. Ultrasound evaluation of the nasogastric tube position in prehospital. *Ann Fr Anest Reanim.* 2012;31:416-20.
21. Weillbach C, Kobiella A, Rahe-Meyer N, Johanning K. [Introduction of Prehospital Emergency Ultrasound into an Emergency Medical Service Area]. *Anaesthesist.* 2017;66:21-7.
22. Brandt HGS, Jepsen CH, Hendriksen OM, Lindekær A, Skjønnemand M. The use of ultrasound to identify veins for peripheral venous access in morbidly obese patients. *Dan Med J.* 2016;63.
23. Breitzkreutz R, Dutiné M, Scheiermann P, Hempel D, Kujumdshiev S, Ackermann H et al. Thorax, trachea, and lung ultrasonography in emergency and critical care medicine: Assessment of an objective structured training concept. *Emerg Med Int.* 2013; DOI:10.1155/2013/312758.
24. Cazes N, Desmots F, Geffroy Y, Renard A, Leyral J, Chaumoitre K. Emergency ultrasound: A prospective study on sufficient adequate training for military doctors. *Diagn Interv Imaging.* 2013;94:1109-15.
25. Chaudery M, Clark J, Morrison JJ, Wilson MH, Bew D, Darzi A. Can contrast-enhanced ultrasonography improve Zone III REBOA placement for prehospital care? *Journal Trauma Acute Care Surg.* 2016; doi:10.1097/TA.0000000000000863.
26. Jang T, Aubin C, Naunheim R, Lewis LM, Kaji AH. Sonographic assessment of jugular venous distension and B-type natriuretic peptide levels in patients with dyspnoea. *Emerg Med J.* 2012;29:477-81.

27. Jang T, Kryder G, Sineff S, Naunheim R, Aubin C, Kaji AH. The technical errors of physicians learning to perform focused assessment with sonography in trauma. *Acad Emerg Med.* 2012;19:98-101.
28. Kim HB, Suh JY, Choi JH, Cho YS. Can serial focussed echocardiographic evaluation in life support (FEEL) predict resuscitation outcome or termination of resuscitation (TOR)? A pilot study. *Resuscitation.* 2016;101:21-6.
29. Lee SE, Uhm JS, Kim JY, Pak HN, Lee MH, Joung B. Combined ECG, echocardiographic, and biomarker criteria for diagnosing acute myocardial infarction in out-of-hospital cardiac arrest patients. *Yonsei Med J.* 2015;56:887-94.
30. Ozkan B, Unluer EE, Akyol PY, Karagoz A, Bayata MS, Akoglu H et al. Stethoscope versus point-of-care ultrasound in the differential diagnosis of dyspnea: a randomized trial. *Eur J Emerg Med.* 2015;22:440-3.
31. Slikkerveer J, Kleijn SA, Appelman Y, Porter TR, Veen G, Rossum AC et al. Ultrasound enhanced prehospital thrombolysis using microbubbles infusion in patients with acute ST elevation myocardial infarction: pilot of the Sonolysis study. *Ultrasound Med Biol.* 2012; doi:10.1016/j.ultrasmedbio.2011.11.001.
32. Ogedegbe C, Morchel H, Hazelwood V, Chaplin WF, Feldman J. Development and evaluation of a novel, real time mobile tele-sonography system in management of patients with abdominal trauma: Study protocol. *BMC Emerg Med.* 2012; DOI: 10.1186/1471-227X-12-19.
33. Hong KJ, Song KJ, Song SW, Shin SD. Detecting prehospital hemoperitoneum remotely through fast and 3 g network: A simulation study. *J Emerg Med.* 2012; DOI: 10.1016/j.jemermed.2012.09.066.
34. Kirkpatrick AW, McKee I, McKee JL, Ma I, McBeth PB, Roberts DJ et al. Remote just-in-time telementored trauma ultrasound: a double-factorial randomized controlled trial examining fluid detection and remote knobology control through an ultrasound graphic user interface display. *Am J Surg.* 2016; 211:894-902.
35. Lyon M, Shiver SA, Walton P. M-mode ultrasound for the detection of pneumothorax during helicopter transport. *Am J Emerg Med.* 2012;30:1577-80.
36. Lyon M, Walton P, Bhalla V, Shiver SA. Ultrasound detection of the sliding lung sign by prehospital critical care providers. *Am J Emerg Med.* 2012;30:485-8.
37. McBeth P, Crawford I, Tiruta C, Xiao Z, Zhu GQ, Shuster M et al. Help is in your pocket: the potential accuracy of smartphone- and laptop-based remotely guided resuscitative tele-sonography. *Telemed J E Health.* 2013;19:924-30.
38. Song KJ, Shin SD, Hong KJ, Cheon KW, Shin I, Song SW et al. Clinical applicability of real-time, prehospital image transmission for FAST (Focused Assessment with Sonography for Trauma). *J Telemed Telecare.* 2013;19:450-5.
